# Supplementary material for: Investigation of metal ligand affinities of atom transfer radical polymerization catalysts with a quadrupole ion trap
Source: Royal Society of Chemistry journal article supplement (doi:10.1039/b909854b), 2009-01-01
Supplement: b909854b.pdf [file b909854b.pdf]

## Electronic Supplementary Information

# Investigation of Metal Ligand Affinities of Atom Transfer Radical Polymerization Catalysts with a Quadrupole Ion Trap

Fabio di Lena and Krzysztof Matyjaszewski\*

Department of Chemistry, Carnegie Mellon University, 4400 Fifth Avenue, Pittsburgh, PA 15213,  
USA. Fax: 1-412-268-6897; Tel: 1-412-268-3209; E-mail: km3b@andrew.cmu.edu.

### ESI-MS spectra

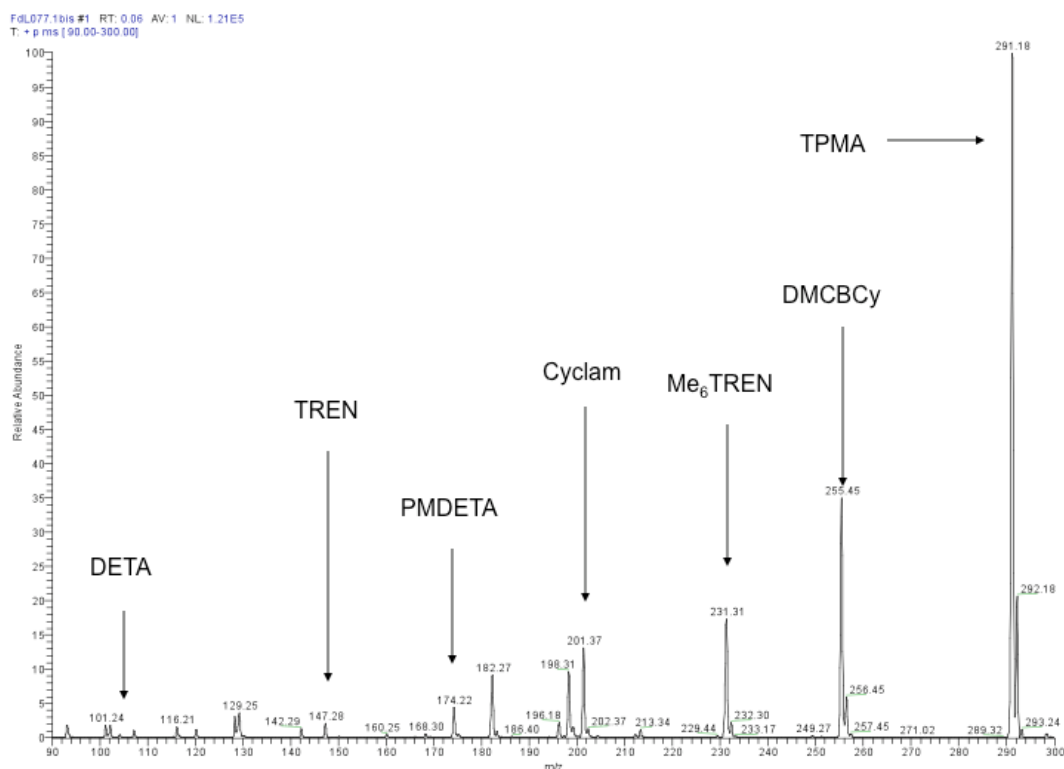

**Figure 1S.** Typical ESI-MS spectrum of ligands in H<sub>2</sub>O:MeOH 9:1 (v:v) before the addition of Cu(OTf)<sub>2</sub>.

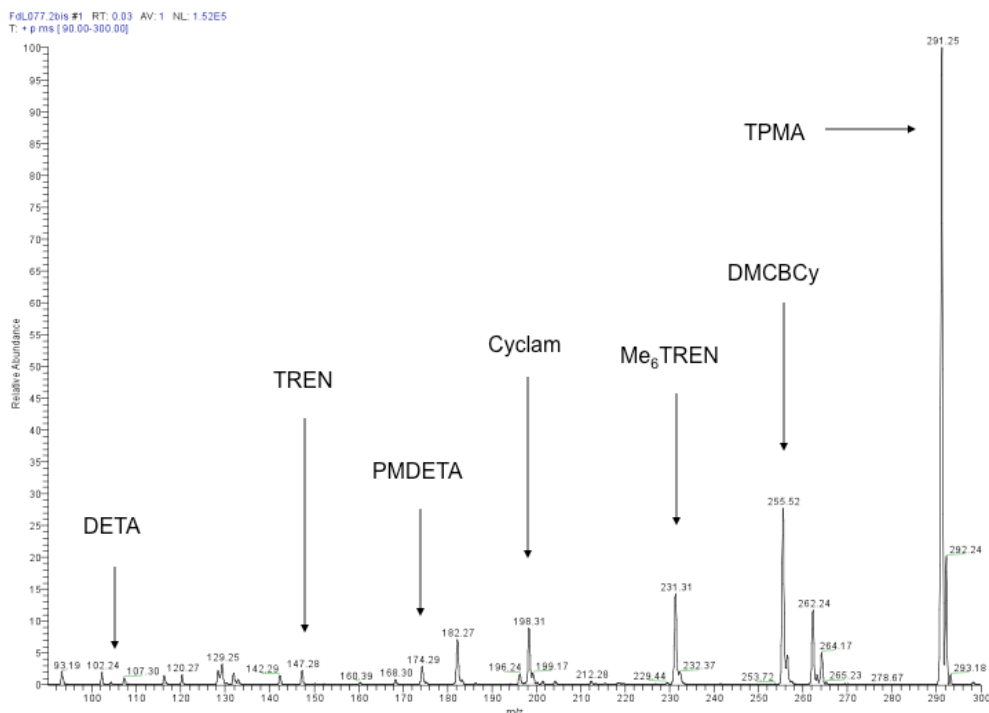

**Figure 2S.** Typical ESI-MS spectrum of ligands in H<sub>2</sub>O:MeOH 9:1 (v:v) after the addition of Cu(OTf)<sub>2</sub> and the 2 h equilibration at 80 °C.

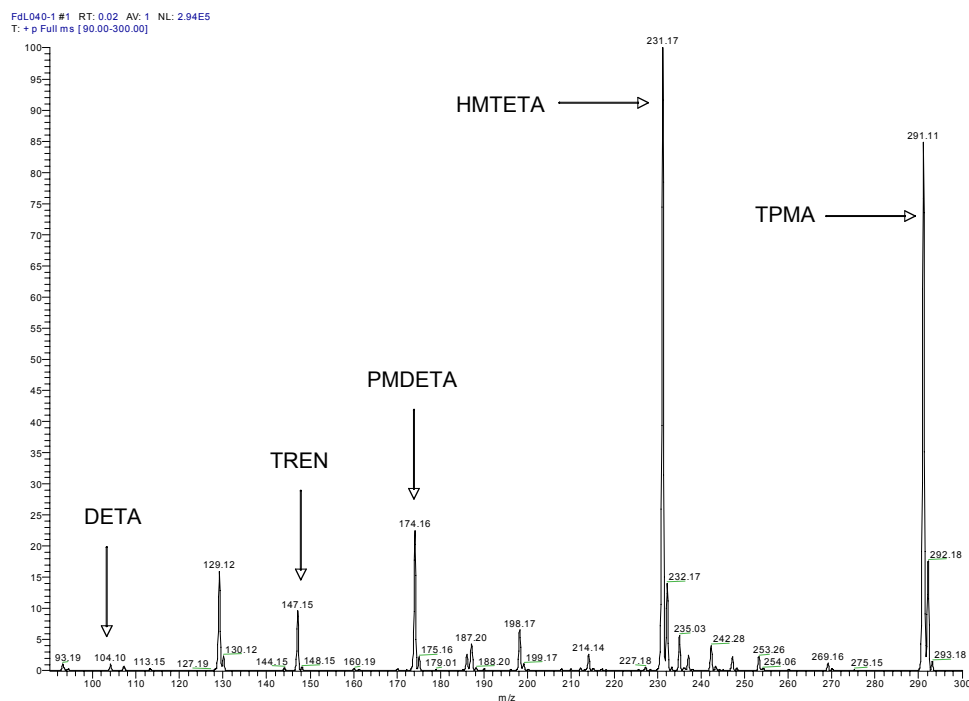

**Figure 3S.** Typical ESI-MS spectrum of ligands in MeCN before the addition of Cu(OTf)<sub>2</sub>.

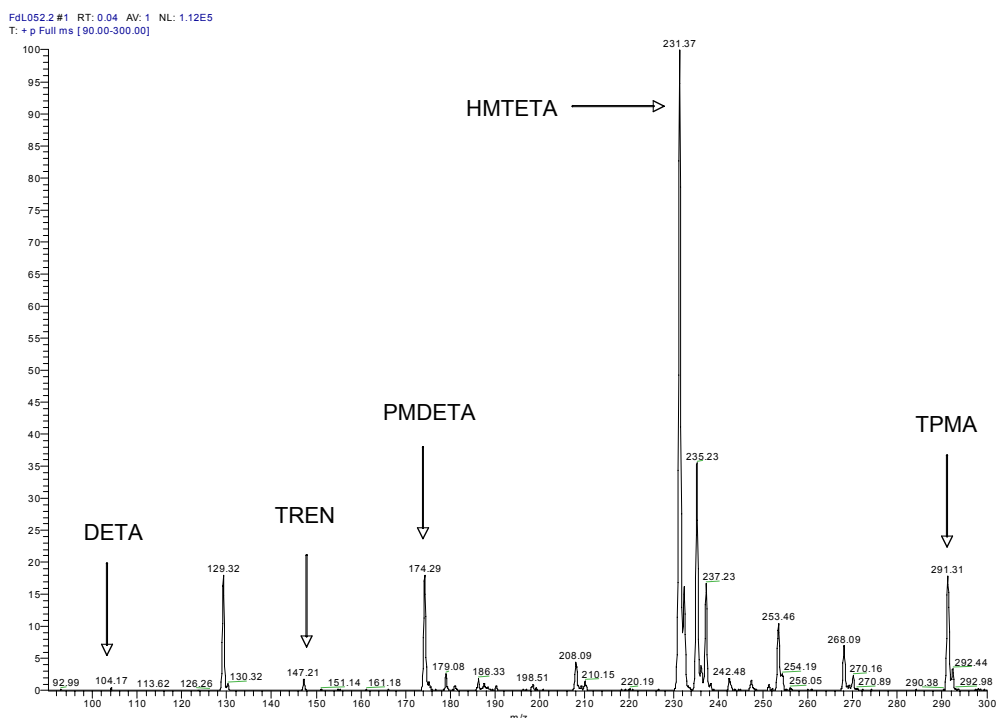

Figure 4S. Typical ESI-MS spectrum of ligands in MeCN after the addition of  $\text{Cu}(\text{OTf})_2$ .

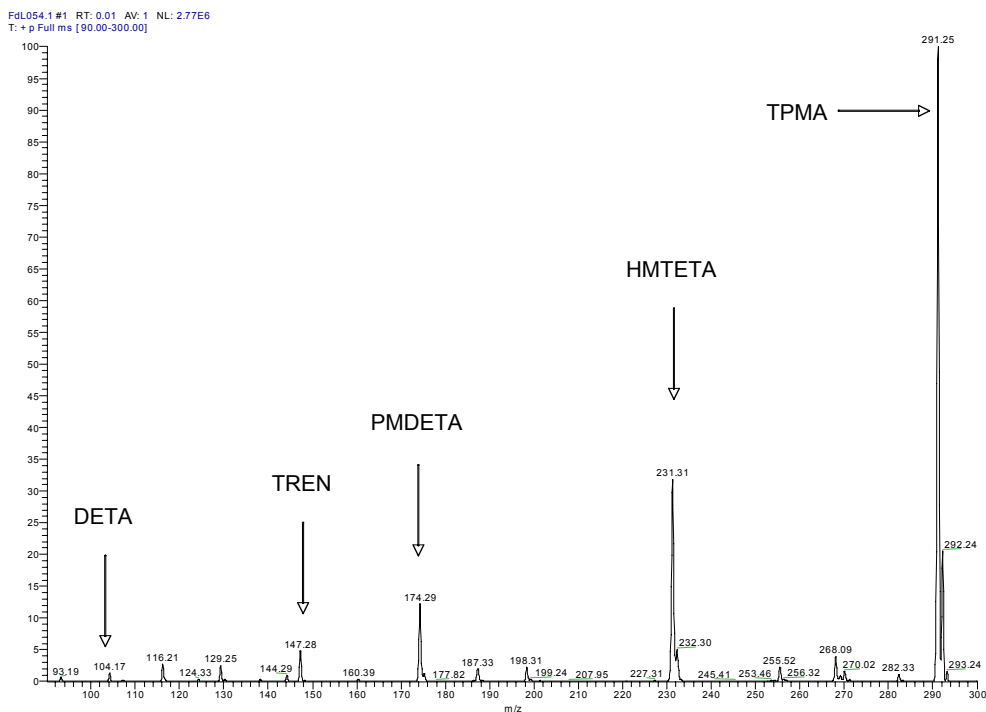

Figure 5S. Typical ESI-MS spectrum of ligands in MeOH before the addition of  $\text{Cu}(\text{OTf})_2$ .

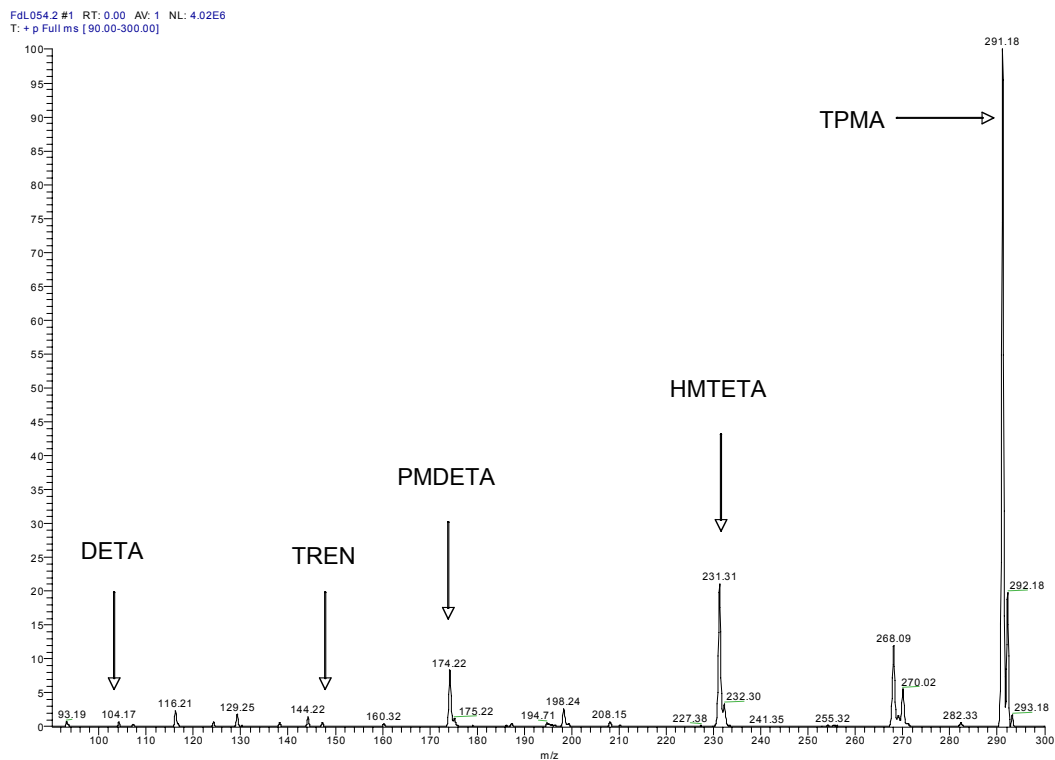

Figure 6S. Typical ESI-MS spectrum of ligands in MeOH after the addition of Cu(OTf)<sub>2</sub>.

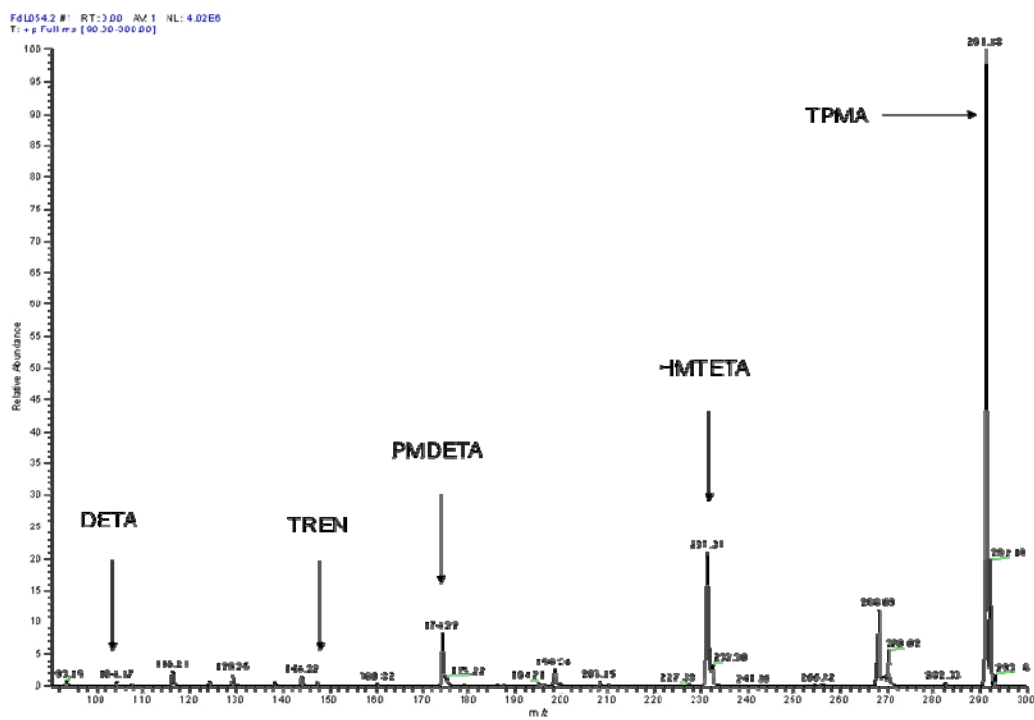

Figure 7S. Typical ESI-MS spectrum of ligands in acetone before the addition of Cu(OTf)<sub>2</sub>.

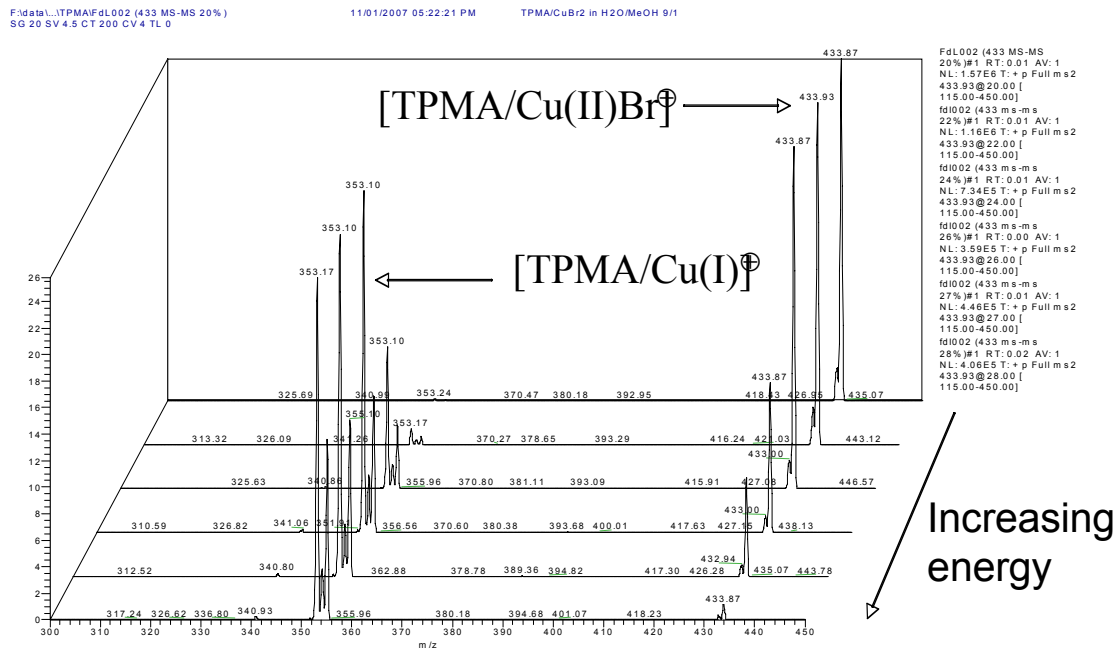

Figure 8S. EV-CAD mass spectra for the decay of  $[TPMA/Cu(II)Br]^{\oplus}$ .

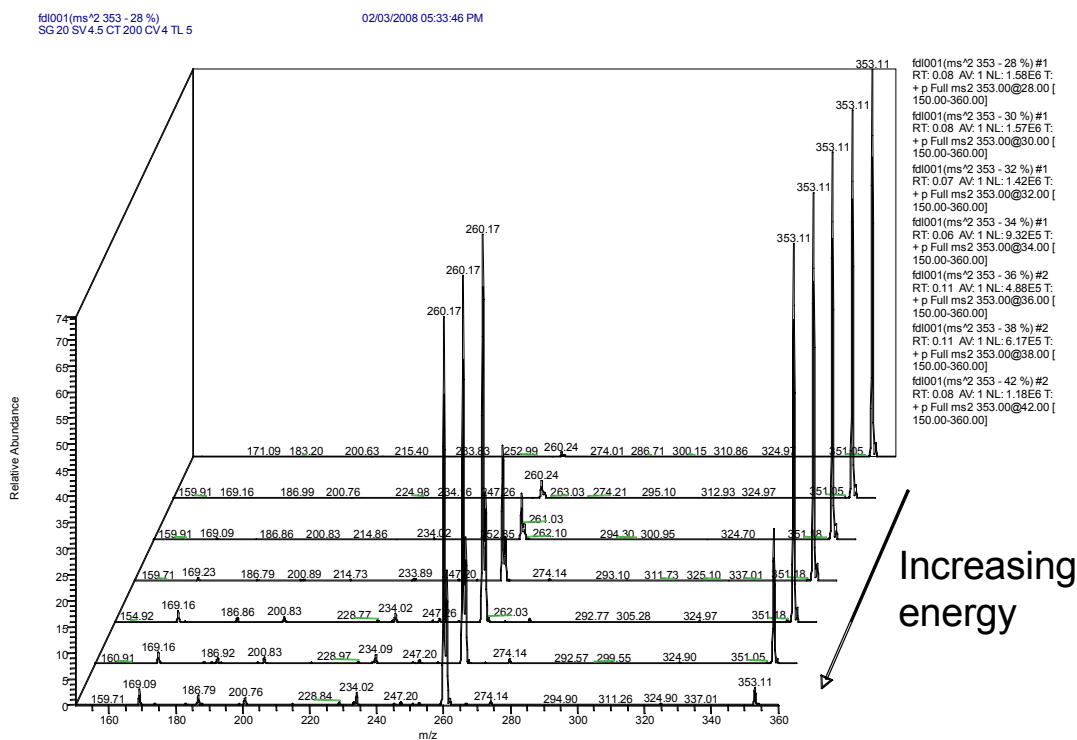

Figure 9S. EV-CAD mass spectra for the decay of  $[TPMA/Cu(I)]^{\oplus}$ .
